# Supplementary material for: Iodine-rich mixed composition perovskites optimised for tin(iv) oxide transport layers: the influence of halide ion ratio, annealing time, and ambient air aging on solar cell performance
Source: Royal Society of Chemistry journal article supplement (doi:10.1039/c9ta02142f), 2019-01-01
Supplement: c9ta02142f1.pdf [file c9ta02142f1.pdf]

## Supporting Information

### **Iodine-rich mixed composition perovskites optimised for tin(IV) oxide transport layers: The influence of halide ion ratio, annealing time, and ambient air aging on solar cell performance**

Masashi Ozaki,<sup>a</sup> Yasuhisa Ishikura,<sup>a</sup> Minh Anh Truong,<sup>a</sup> Jiewei Liu,<sup>a</sup> Iku Okada,<sup>b</sup> Taro Tanabe,<sup>b</sup> Shun Sekimoto,<sup>c</sup> Tsutomu Ohtsuki,<sup>c</sup> Yasujiro Murata,<sup>a</sup> Richard Murdey<sup>a</sup> and Atsushi Wakamiya<sup>\*a</sup>

<sup>a</sup> Institute for Chemical Research, Kyoto University, Uji, Kyoto 611-0011, Japan

<sup>b</sup> Fine Chemicals R&D, Toda Research Center, Tokyo Chemical Industry Co., Ltd. Toda, Saitama 335-0033, Japan

<sup>c</sup> Institute for Integrated Radiation and Nuclear Science, Kyoto University, Sen-nan-gun, Osaka 590-0494, Japan

## Table of Contents

|                                                                                  |         |
|----------------------------------------------------------------------------------|---------|
| 1. Materials                                                                     | S3      |
| 2. Equipment                                                                     | S3      |
| 3. Preparation of $\text{FAPbI}_3 \cdot 2\text{DMF}$ and Derivatives             | S5      |
| 4. Single Crystal X-Ray Structure Analysis of $\text{FAPbI}_3 \cdot 2\text{DMF}$ | S5      |
| 5. Thin Film Fabrication                                                         | S6      |
| 6. Solar Cell Fabrication                                                        | S7      |
| 7. Neutron Activation Analysis                                                   | S10     |
| Figure S1–S12 and Table S1–S4                                                    | S11-S23 |
| References                                                                       | S24     |

## 1. Materials

Methylammonium iodide (MAI, 99.0%), methylammonium bromide (MABr, 98.0%), formamidinium iodide (FAI, 98.0%), formamidinium bromide (FABr, 98.0%), lead(II) bromide ( $\text{PbBr}_2$ , 98.0%), and trifluoroacetic acid (TFA, 99.0%) were purchased from Tokyo Chemical Industry Co., Ltd. (TCI). Cesium(I) iodide (CsI, 95%) and lithium(I) bis(trifluoromethanesulfonyl)imide (LiTFSI) were purchased from Wako Pure Chemical Industries, Ltd. Co(III) (4-*tert*-butylpyridyl-2-1H-pyrazole)<sub>3</sub>·3bis(trifluoromethanesulfonyl)imide (FK 209, Co(III)TFSI, 98%) was purchased from Sigma-Aldrich Co., Ltd. 2,2',7,7'-tetrakis(*N,N*-di-*p*-methoxyphenylamino)-9,9'-spirobifluorene (spiro-OMeTAD) was purchased from Merck Co., Ltd. These materials were used as received. Acetone (99%), ethanol (EtOH, super dehydrated), dimethylsulfoxide (DMSO, super dehydrated), dimethylformamide (DMF, super dehydrated) were purchased from Wako Pure Chemical Industries, Ltd. Toluene (super dehydrated) was purchased from Kanto Chemical Co., Inc. 4-*tert*-butylpyridine (TBP, 96%) was purchased from Sigma-Aldrich Co., Ltd. All of these solvents were degassed by Ar gas bubbling for 1 h and further dried over molecular sieves in a  $\text{N}_2$ -filled glove box ( $\text{O}_2 < 1$  ppm) before use. Glass-ITO substrates (10  $\Omega/\text{sq.}$ ) and quartz glass substrates were purchased from Geomatec Co., Ltd. and Asahi Glass Co., Ltd., respectively.

## 2. Equipment

Thermogravimetric analysis (TGA) was performed on TGA-50 (Shimadzu Co.) and TG-8120 (Rigaku Co.) instruments. Single crystal X-ray structure analysis was performed on a Bruker Single Crystal CCD X-ray Diffractometer SMART APEX II with Mo  $K\alpha$  radiation ( $\lambda = 0.71073$  Å) and graphite monochromator (Bruker Co.).  $^1\text{H}$  NMR spectra were recorded with JEOL JNM ECA400 (400 MHz). Chemical shifts are reported in  $\delta$  ppm using residual protons in the deuterated solvents. Inductively coupled plasma mass spectrometry (ICP-MS) was conducted at NANO SCIENCE Co. Energy dispersive X-ray spectroscopy (EDX) observation was conducted at Toray Research Center Inc. Photo-electron spectroscopy in air (PESA) measurement was performed on an AC-3 (RIKEN KEIKI Co., Ltd). UV-Vis-NIR absorption measurement was performed with a UV-3600Plus spectrometer (Shimadzu Co.). Scanning electron microscope (SEM) images were recorded on a

SU8010 (Hitachi High-Technologies Co.) equipped with EDAX (AMETEK Inc.). Transmission electron microscope (TEM) images were recorded on a JEM-F200 (JEOL Ltd.). For aging, devices were stored in a cabinet with middle humidity (TDC-157-DD, TOLIHAN Co.).

The  $J-V$  curves and IPCE spectra of perovskite solar cells were measured in air with OTENTO-SUNIII and OTENTO-SUN-P1G instruments (Bunkoukeiki, Co. Ltd.), respectively. The scans were performed in both forward and reverse directions, with 50 mV voltage step and 1 s dwell time. IPCE spectra were recorded on a Bunkoukeiki SMO-250III system. The light intensity of the illumination source was calibrated against standard BS520 and SiPD S1337-1010BQ silicon photodiodes for the  $J-V$  and IPCE measurements, respectively. During the  $J-V$  and IPCE measurement, a shadow mask was used giving an active area of 0.1 cm<sup>2</sup>. Impedance spectroscopy data was obtained in air with a 4192A LF impedance analyzer (Hewlett-Packard Company), at zero volts applied bias, 30 mV oscillator voltage, 10-10,000 Hz frequency scan, with the measurement devices under AM1.5G simulated solar radiation with a 0.04 cm<sup>-2</sup> shadow mask.

### 3. Preparation of $\text{FAPbI}_3 \cdot 2\text{DMF}$ and Derivatives

#### $\text{FAPbI}_3 \cdot 2\text{DMF}$

FAI (344 mg, 2.0 mmol) and  $\text{PbI}_2$  (922 mg, 2.0 mmol) were dissolved in DMF (2.0 mL) at 70 °C for 10 min. The resulting clear yellow solution was filtered with a membrane filter to remove an insoluble component. 200  $\mu\text{L}$  of the solution was transferred to a glass tube. A small quantity of DMF was added to the top of this layer, then toluene (1.0 mL) was slowly layered over the solution. After standing at room temperature for two days, colorless needle-like  $\text{FAPbI}_3 \cdot 2\text{DMF}$  crystals were collected by filtration (105 mg, 0.13 mmol, 65% yield).

#### $\text{FAPbI}_3 \cdot \text{DMF}$

FAI (18.7 g, 109 mmol) and  $\text{PbI}_2$  (49.8 g, 108 mmol) were dissolved in DMF (120 mL). The resulting clear yellow solution was filtered with a membrane filter to remove an insoluble component. 40 mL of DMF was added to the top of this layer, then toluene (550 mL) was slowly layered over the solution. After standing at room temperature for four days, colorless needle-like  $\text{FAPbI}_3 \cdot 2\text{DMF}$  crystals were collected by filtration (53.9 g, 76.3 mmol, 70% yield). The ratio of  $\text{FA}^+:\text{DMF}$  was confirmed  $^1\text{H}$  NMR analysis (Figure S4).

#### $\text{FAPbI}_3$

After drying of  $\text{FAPbI}_3 \cdot \text{DMF}$  complex (18.2 g, 25.8 mmol) under vacuum at 50 °C for two days, yellow crystalline solids of  $\text{FAPbI}_3$  were obtained (16.3 g, 25.7 mmol, 99% yield). The absence of DMF was confirmed by  $^1\text{H}$  NMR analysis (Figure S6).

### 4. Single Crystal X-Ray Structure Analysis of $\text{FAPbI}_3 \cdot 2\text{DMF}$

The crystallographic data has been deposited with the Cambridge Crystallographic Data Centre (CCDC) as supplementary publication number CCDC-1881162 ( $\text{FAPbI}_3 \cdot 2\text{DMF}$ ). Data files can be obtained free of charge from the CCDC *via* [www.ccdc.cam.ac.uk/data\\_request/cif](http://www.ccdc.cam.ac.uk/data_request/cif).

Intensity data were collected at 100 K. A total of 7146 reflections were measured with a maximum  $2\theta$  angle of 51.0°, of which 3465 were independent reflections ( $R_{\text{int}} = 0.0225$ ). The

structure was solved by direct methods (SHELXS-97<sup>1</sup>) and refined by the full-matrix least-squares on  $F^2$  (SHELXL-97<sup>1</sup>). All non-hydrogen atoms were refined anisotropically. All hydrogen atoms were placed using AFIX instructions. The crystal data are as follows:  $C_7H_{19}I_3N_4O_2Pb$ ; FW = 779.15, crystal size  $0.46 \times 0.12 \times 0.10$  mm<sup>3</sup>, Triclinic,  $P-1$ ,  $a = 7.8936(9)$  Å,  $b = 10.5075(12)$  Å,  $c = 12.6927(15)$  Å,  $\alpha = 75.8214(12)^\circ$ ,  $\beta = 74.9250(12)^\circ$ ,  $\gamma = 68.9286(12)^\circ$ ,  $V = 935.06(19)$  Å<sup>3</sup>,  $Z = 2$ ,  $D_c = 2.767$  g cm<sup>-3</sup>. The refinement converged to  $R_1 = 0.0199$ ,  $wR_2 = 0.0503$  ( $I > 2\sigma(I)$ ), GOF = 1.056.

## 5. Thin Film Fabrication

### *Preparation of the SnO<sub>2</sub> layer*

Glass-ITO substrates (10 Ω/sq.) were etched with zinc powder and HCl (6 M in de-ionized water). The patterned substrates (25 mm × 25 mm) were then treated with ultrasonic cleaning for 10 min cycles for, in order: a 1 wt% neutral aqueous detergent solution, acetone, and 2-propanol. This was followed by UV-ozone treatment for 15 min. The SnO<sub>2</sub> layer was prepared by spin-coating a colloidal dispersion (15% in H<sub>2</sub>O, 3.0 mL) diluted with deionized water (3.0 mL) on the glass-ITO substrates (slope 3 s, 2000 rpm 30 s, slope 3 s) followed by annealing at 150 °C for 30 min. After cooling to room temperature, organic residues on the substrates were removed with 15 min UV-ozone treatment.

All the subsequent procedures described in this section were conducted in an inert gas filled glove box.

### *Fabrication of Cs<sub>0.05</sub>FA<sub>0.80</sub>MA<sub>0.15</sub>PbI<sub>2.75</sub>Br<sub>0.25</sub> layer (for PES and UV-Vis-NIR measurement)*

The precursor solution was prepared from CsI (83 mg, 0.32 mmol), MABr (102 mg, 0.91 mmol), PbBr<sub>2</sub> (116 mg, 0.32 mmol), PbI<sub>2</sub> (422 mg, 0.92 mmol), and FAPbI<sub>3</sub>·DMF (3464 mg, 4.91 mmol) dissolved in a mixture of DMF (3.2 mL) and DMSO (1.1 mL). After stirring at 40 °C for 30 min, the solution was filtered with a 0.45 μm PTFE filter. 200 μL of the solution was placed on a ITO substrate (for PES) or on a quartz plate (for UV-Vis-NIR), and spread by spin-coating (slope 1 s, 1000 rpm 10 s, slope 5 s, 6000 rpm 20 s, slope 1 s) to make a thin film. A 300 μL of

chlorobenzene was dripped over the rotating substrate at 3 s before the end of the spinning at 6000 rpm. The films were then annealed on a hot plate at 150 °C for 10 min.

*Fabrication of  $Cs_{0.05}FA_{0.80}MA_{0.15}PbI_{2.75}Br_{0.25}$  layer (for SEM observation)*

The precursor solution was prepared from CsI (44 mg, 0.17 mmol), MABr (54 mg, 0.48 mmol),  $PbBr_2$  (68 mg, 0.18 mmol),  $PbI_2$  (225 mg, 0.49 mmol), and  $FAPbI_3 \cdot DMF$  (1659 mg, 2.35 mmol) dissolved in DMF (2.4 mL) and DMSO (0.72 mL). After stirring at 40 °C for 30 min, the solution was filtered with a 0.45  $\mu m$  PTFE filter. 200  $\mu L$  of the solution was placed on a  $SnO_2$  substrate and spread by spin-coating (slope 1 s, 1000 rpm 10 s, slope 5 s, 3000 rpm 20 s, slope 1 s) to make a thin film. At 3 s before the end of the spinning at 3000 rpm, 300  $\mu L$  of chlorobenzene was dripped over the rotating substrate. The film was annealed on a hot plate at 150 °C for 0, 10 s, 1 min, 5 min, 10 min, 30 min, or 120 min.

## 6. Solar Cell Fabrication

All the procedures described in this section were conducted in a glove box filled with inert gas.

*Fabrication of  $Cs_{0.05}FA_{0.79}MA_{0.16}PbI_{2.44}Br_{0.56}$  layer (from FAI: influence of FA source)*

The precursor solution was prepared from CsI (37 mg, 0.14 mmol), MABr (49 mg, 0.44 mmol), FAI (342 mg, 2.0 mmol),  $PbBr_2$  (199 mg, 0.54 mmol), and  $PbI_2$  (1.01 g, 2.2 mmol) dissolved in DMF (1.60 mL) and DMSO (0.48 mL). After stirring at 40 °C for 30 min, the solution was filtered with a 0.45  $\mu m$  PTFE filter. 200  $\mu L$  of the solution was placed on the  $SnO_2$  substrate and spread by spin-coating (slope 1 s, 1000 rpm 10 s, slope 5 s, 6000 rpm 20 s, slope 1 s) to make a thin film. 300  $\mu L$  of chlorobenzene was dripped over the rotating substrate at 3 s before the end of spinning at 6000 rpm. The film was annealed on a hot plate at 150 °C for 10 min.

*Fabrication of  $Cs_{0.05}FA_{0.79}MA_{0.16}PbI_{2.44}Br_{0.56}$  layer (from  $FAPbI_3 \cdot DMF$ : influence of FA source)*

The precursor solution was prepared from CsI (37 mg, 0.14 mmol), MABr (49 mg, 0.44 mmol),  $PbBr_2$  (199 mg, 0.54 mmol),  $PbI_2$  (16 mg, 0.03 mmol), and  $FAPbI_3 \cdot DMF$  (1.52 g, 2.15 mmol) dissolved in DMF (1.43 mL) and DMSO (0.48 mL). After stirring at 40 °C for 30 min, the

solution was filtered with a 0.45  $\mu\text{m}$  PTFE filter. 200  $\mu\text{L}$  of the solution was placed on the  $\text{SnO}_2$  substrate and spread by spin-coating (slope 1 s, 1000 rpm 10 s, slope 5 s, 6000 rpm 20 s, slope 1 s) to make a thin film. 300  $\mu\text{L}$  of chlorobenzene was dripped over the rotating substrate at 3 s before the end of spinning at 6000 rpm. The film was annealed on a hot plate at 150  $^\circ\text{C}$  for 10 min.

*Fabrication of  $\text{Cs}_{0.05}\text{FA}_{0.78}\text{MA}_{0.12}\text{PbI}_{2.49}\text{Br}_{0.51}$  layer ( $I:\text{Br} = 5:1$ )*

The precursor solution was prepared from CsI (55 mg, 0.21 mmol), MABr (67 mg, 0.60 mmol), FAI (516 mg, 3.0 mmol),  $\text{PbBr}_2$  (297 mg, 0.81 mmol), and  $\text{PbI}_2$  (1521 mg, 3.0 mmol) dissolved in DMF (2.4 mL) and DMSO (0.6 mL). After stirring at 40  $^\circ\text{C}$  for 30 min, the solution was filtered with a 0.45  $\mu\text{m}$  PTFE filter. 200  $\mu\text{L}$  of the solution was placed on the  $\text{SnO}_2$  substrate and spread by spin-coating (slope 1 s, 1000 rpm 10 s, slope 5 s, 6000 rpm 20 s, slope 1 s) to make a thin film. 300  $\mu\text{L}$  of chlorobenzene was dripped over the rotating substrate at 3 s before the end of spinning at 6000 rpm. The film was annealed on a hot plate at 150  $^\circ\text{C}$  for 10 min.

*Fabrication of  $\text{Cs}_{0.06}\text{FA}_{0.84}\text{MA}_{0.10}\text{PbI}_{2.59}\text{Br}_{0.41}$  layer ( $I:\text{Br} = 6:1$ )*

The precursor solution was prepared from CsI (55 mg, 0.21 mmol), MABr (44 mg, 0.39 mmol),  $\text{PbBr}_2$  (228 mg, 0.62 mmol),  $\text{PbI}_2$  (128 mg, 0.28 mmol), and  $\text{FAPbI}_3\cdot\text{DMF}$  (2255 mg, 3.19 mmol) dissolved in DMF (2.125 mL) and DMSO (0.72 mL). After stirring at 40  $^\circ\text{C}$  for 30 min, the solution was filtered with a 0.45  $\mu\text{m}$  PTFE filter. 200  $\mu\text{L}$  of the solution was placed on the  $\text{SnO}_2$  substrate and spread by spin-coating (slope 1 s, 1000 rpm 10 s, slope 5 s, 6000 rpm 20 s, slope 1 s) to make a thin film. 300  $\mu\text{L}$  of chlorobenzene was dripped over the rotating substrate 3 s before the end of spinning at 6000 rpm. The film was annealed on a hot plate at 150  $^\circ\text{C}$  for 10 min.

*Fabrication of  $\text{Cs}_{0.05}\text{FA}_{0.80}\text{MA}_{0.15}\text{PbI}_{2.75}\text{Br}_{0.25}$  layer ( $I:\text{Br} = 11:1$ , Reference)*

The precursor solution was prepared from CsI (55 mg, 0.21 mmol), MABr (68 mg, 0.61 mmol),  $\text{PbBr}_2$  (77 mg, 0.21 mmol),  $\text{PbI}_2$  (281 mg, 0.61 mmol), and  $\text{FAPbI}_3\cdot\text{DMF}$  (2309 mg, 3.27 mmol) dissolved in DMF (2.147 mL) and DMSO (0.72 mL). After stirring at 40  $^\circ\text{C}$  for 30 min, the solution was filtered with a 0.45  $\mu\text{m}$  PTFE filter. 200  $\mu\text{L}$  of the solution was placed on the  $\text{SnO}_2$  substrate and spread by spin-coating (slope 1 s, 1000 rpm 10 s, slope 5 s, 6000 rpm 20 s, slope 1 s)

to make a thin film. 300  $\mu$ L of chlorobenzene was dripped over the rotating substrate at 3 s before the end of spinning at 6000 rpm. The film was annealed on a hot plate at 150  $^{\circ}$ C for 10 min.

*Fabrication of  $Cs_{0.05}FA_{0.80}MA_{0.15}PbI_{2.75}Br_{0.25}$  layer (Annealing Experiments)*

The precursor solution was prepared from CsI (55 mg, 0.21 mmol), MABr (68 mg, 0.61 mmol), PbBr<sub>2</sub> (77 mg, 0.21 mmol), PbI<sub>2</sub> (281 mg, 0.61 mmol), and FAPbI<sub>3</sub>·DMF (2309 mg, 3.27 mmol) dissolved in DMF (2.147 mL) and DMSO (0.72 mL). After stirring at 40  $^{\circ}$ C for 30 min, the solution was filtered with a 0.45  $\mu$ m PTFE filter. 200  $\mu$ L of the solution was placed on the SnO<sub>2</sub> substrate and spread by spin-coating (slope 1 s, 1000 rpm 10 s, slope 5 s, 6000 rpm 20 s, slope 1 s) to make a thin film. At 3 s before the end of spinning at 6000 rpm, 300  $\mu$ L of chlorobenzene was dripped over the rotating substrate. The resulting brown film was annealed on a hot plate at 150  $^{\circ}$ C for 1 min, 5 min, 10 min, or 30 min.

*Fabrication of  $Cs_{0.05}FA_{0.80}MA_{0.15}PbI_{2.75}Br_{0.25}$  (from FAPbI<sub>3</sub>·DMF: influence of FAPbI<sub>3</sub> source)*

The precursor solution was prepared from CsI (22 mg, 0.085 mmol), MABr (27 mg, 0.24 mmol), PbBr<sub>2</sub> (31 mg, 0.084 mmol), PbI<sub>2</sub> (113 mg, 0.25 mmol), and FAPbI<sub>3</sub>·DMF (0.93 g, 1.31 mmol) dissolved in DMF (1.10 mL) and DMSO (0.36 mL). After stirring at 40  $^{\circ}$ C for 30 min, the solution was filtered with a 0.45  $\mu$ m PTFE filter. 200  $\mu$ L of the solution was placed on the SnO<sub>2</sub> substrate and spread by spin-coating (slope 1 s, 1000 rpm 10 s, slope 5 s, 3000 rpm 20 s, slope 1 s) to make a thin film. 300  $\mu$ L of chlorobenzene was dripped over the rotating substrate at 3 s before the end of spinning at 3000 rpm. The film was annealed on a hot plate at 150  $^{\circ}$ C for 10 min.

*Fabrication of  $Cs_{0.05}FA_{0.80}MA_{0.15}PbI_{2.75}Br_{0.25}$  (from FAPbI<sub>3</sub>: influence of FAPbI<sub>3</sub> source)*

The precursor solution was prepared from CsI (22 mg, 0.085 mmol), MABr (27 mg, 0.24 mmol), PbBr<sub>2</sub> (31 mg, 0.084 mmol), PbI<sub>2</sub> (113 mg, 0.25 mmol), and FAPbI<sub>3</sub> (0.83 g, 1.31 mmol) dissolved in DMF (1.20 mL) and DMSO (0.36 mL). After stirring at 40  $^{\circ}$ C for 30 min, the solution was filtered with a 0.45  $\mu$ m PTFE filter. 200  $\mu$ L of the solution was placed on the SnO<sub>2</sub> substrate and spread by spin-coating (slope 1 s, 1000 rpm 10 s, slope 5 s, 3000 rpm 20 s, slope 1 s) to make a

thin film. 300  $\mu$ L of chlorobenzene was dripped over the rotating substrate at 3 s before the end of spinning at 3000 rpm. The film was annealed on a hot plate at 150  $^{\circ}$ C for 10 min.

#### *Deposition of the spiro-OMeTAD layer and the Au electrodes*

Spiro-OMeTAD (73.5 mg, 0.060 mmol), Co(III)TFSI complex (FK 209, 13.5 mg, 0.0090 mmol), TBP (27.0  $\mu$ L, 0.20 mmol), and LiTFSI (8.6 mg, 0.030 mmol) were dissolved in chlorobenzene (1.0 mL). After stirring at 70  $^{\circ}$ C for 30 min, the suspension was filtered with a 0.45  $\mu$ m PTFE filter. 100  $\mu$ L of the solution was spread over on the perovskite layer by spin-coating (slope 5 s, 4000 rpm, 30 s, slope 5 s), followed by annealing at 70  $^{\circ}$ C for 30 min. The devices were transferred under inert atmosphere to a vacuum chamber where 80 nm gold electrodes were thermally evaporated on the spiro-OMeTAD layer through a shadow mask.

### **7. Neutron Activation Analysis (NAA)**

#### *Preparation of perovskite powder ( $\text{Cs}_{0.05}\text{FA}_{0.80}\text{MA}_{0.15}\text{PbI}_{2.75}\text{Br}_{0.25}$ )*

The precursor solution was prepared from CsI (133 mg, 0.51 mmol), MABr (163 mg, 1.46 mmol), PbBr<sub>2</sub> (184 mg, 0.50 mmol), PbI<sub>2</sub> (675 mg, 1.46 mmol), and FAPbI<sub>3</sub>·DMF (5551 mg, 7.86 mmol) dissolved in DMF (6.59 mL) and DMSO (2.16 mL). After stirring at 40  $^{\circ}$ C for 30 min, the solution was filtered with a 0.45  $\mu$ m PTFE filter. 200  $\mu$ L of the solution was placed on a quartz plate and spread by spin-coating (slope 1 s, 1000 rpm 10 s, slope 5 s, 3000 rpm 20 s, slope 1 s) to make a thin film. At 3 s before the end of spinning at 3000 rpm, 300  $\mu$ L of chlorobenzene was dripped over the rotating substrate. The resulting film was annealed on a hot plate at 150  $^{\circ}$ C for 10 min. After cooling to room temperature, the sample of 15.3 mg of perovskite powder was scraped off from 35 substrates with a spatula. The sample was placed in doubly sealed clean polyethylene bags.

#### *Reference sample preparation*

50 mg of KI, KBr, CsI and CsBr were weighed and placed in doubly sealed clean polyethylene bags.

### *Neutron irradiation and gamma-ray spectrometry*

The sample of the perovskite powder, together with the four chemical reagents for the reference samples, were irradiated for 10 sec with a thermal neutron flux of  $3.3 \times 10^{12} \text{ cm}^{-2} \text{ s}^{-1}$  at Kyoto University Reactor (KUR) in Institute for Integrated Radiation and Nuclear Science, Kyoto University (KURNS). After irradiation, outer bags of all the samples were exchanged by new (non-irradiated) plastic bags and they were subjected to gamma-ray counting. Gamma rays emitted from irradiated samples were measured using germanium semiconductor detectors at KURNS.

Measurements were repeated with different cooling intervals. Iodine in the perovskite powder and references were determined with measurement time of 100–400 sec just after irradiation. After a day cooling, Br in the perovskite powder and references were determined with measurement time of 3000–15000 sec and 200–400 sec, respectively. After three weeks cooling, Cs in the perovskite powder and references were determined with measurement time of 70000–100000 sec and 300–800 sec, respectively. In relative method of NAA, test samples and reference samples for quantification are usually measured at the same position in gamma-ray counting for simplifying the data reduction procedure and reducing analytical uncertainty. In gamma-ray measurements for Br and I, those samples were placed at 26 cm apart from the Ge detector surface to keep the counting loss smaller than 10% while for Cs the counting position was as close as possible to the detector surface.

### *Data reduction*

Nuclear data related to this study are summarized in Table S3. An  $(n, \gamma)$  reaction was used in NAA for all elements. The elemental contents were determined by a relative method. Iodine was determined by using the reagents, KI and CsI and two sets of results were consistent. Bromine was determined by KBr and CsBr and two sets of results were consistent. Cesium was determined by CsI and CsBr and two sets of results were also consistent. Table S4 showed result of NAA.

Customer: **Kyoto University**  
Date: **24-Nov-15**

P.O.# **EJM-67214H**  
Job # **J0FSR559**

Customer ID: **Pb**  
**FAPbI<sub>3</sub> 2DMF**

Sample ID: **S151120037**

[Rev: 2015-11-24 12:14:30]

| Element | Concentration<br>[ppm wt] | Element | Concentration<br>[ppm wt] |
|---------|---------------------------|---------|---------------------------|
| Li      | < 0.5                     | In      | < 0.5                     |
| Be      | < 0.5                     | Sn      | < 0.5                     |
| B       | < 0.5                     | Sb      | < 0.5                     |
| Na      | 5                         | Te      | < 0.5                     |
| Mg      | < 0.5                     | Cs      | < 0.5                     |
| Al      | < 0.5                     | Ba      | < 0.5                     |
| Si      | < 5                       | La      | < 0.5                     |
| P       | < 5                       | Ce      | < 0.5                     |
| K       | < 5                       | Pr      | < 0.5                     |
| Ca      | < 5                       | Nd      | < 0.5                     |
| Sc      | < 0.5                     | Sm      | < 0.5                     |
| Ti      | < 0.5                     | Eu      | < 0.5                     |
| V       | < 0.5                     | Gd      | < 0.5                     |
| Cr      | < 0.5                     | Tb      | < 0.5                     |
| Mn      | < 0.5                     | Dy      | < 0.5                     |
| Fe      | < 5                       | Ho      | < 0.5                     |
| Co      | < 0.5                     | Er      | < 0.5                     |
| Ni      | < 0.5                     | Tm      | < 0.5                     |
| Cu      | 3.9                       | Yb      | < 0.5                     |
| Zn      | 3.7                       | Lu      | < 0.5                     |
| Ga      | < 0.5                     | Hf      | < 0.5                     |
| Ge      | < 0.5                     | Ta      | < 0.5                     |
| As      | < 0.5                     | W       | < 0.5                     |
| Se      | < 0.5                     | Re      | < 0.5                     |
| Rb      | < 0.5                     | Os      | < 0.5                     |
| Sr      | < 0.5                     | Ir      | < 0.5                     |
| Y       | < 0.5                     | Pt      | < 0.5                     |
| Zr      | < 0.5                     | Au      | < 0.5                     |
| Nb      | < 0.5                     | Hg      | < 0.5                     |
| Mo      | < 0.5                     | Tl      | < 0.5                     |
| Ru      | < 0.5                     | Pb      | < 0.5                     |
| Rh      | 2.7                       | Bi      | < 0.5                     |
| Pd      | < 0.5                     | Th      | < 0.5                     |
| Ag      | < 0.5                     | U       | < 0.5                     |
| Cd      | < 0.5                     |         |                           |

**Figure S1.** Inductively coupled plasma-mass spectrometry (ICP-MS) elemental analysis of FAPbI<sub>3</sub>·2DMF.

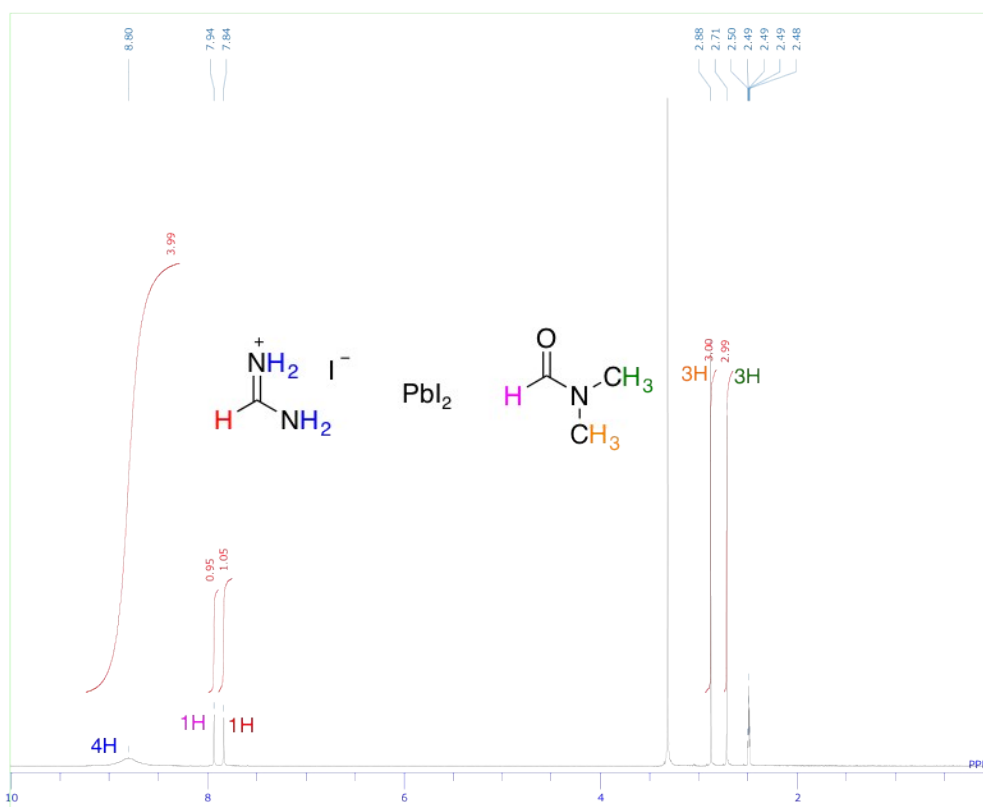

**Figure S2.**  $^1\text{H}$  NMR of  $\text{FAPbI}_3 \cdot \text{DMF}$  complex in  $\text{DMSO}-d_6$ .

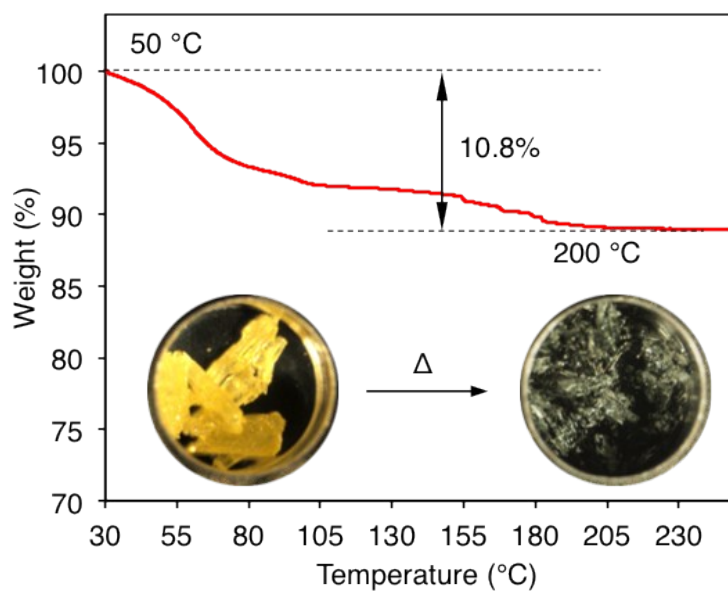

**Figure S3.** TG curve and photographs of the  $\text{FAPbI}_3 \cdot \text{DMF}$  complex.

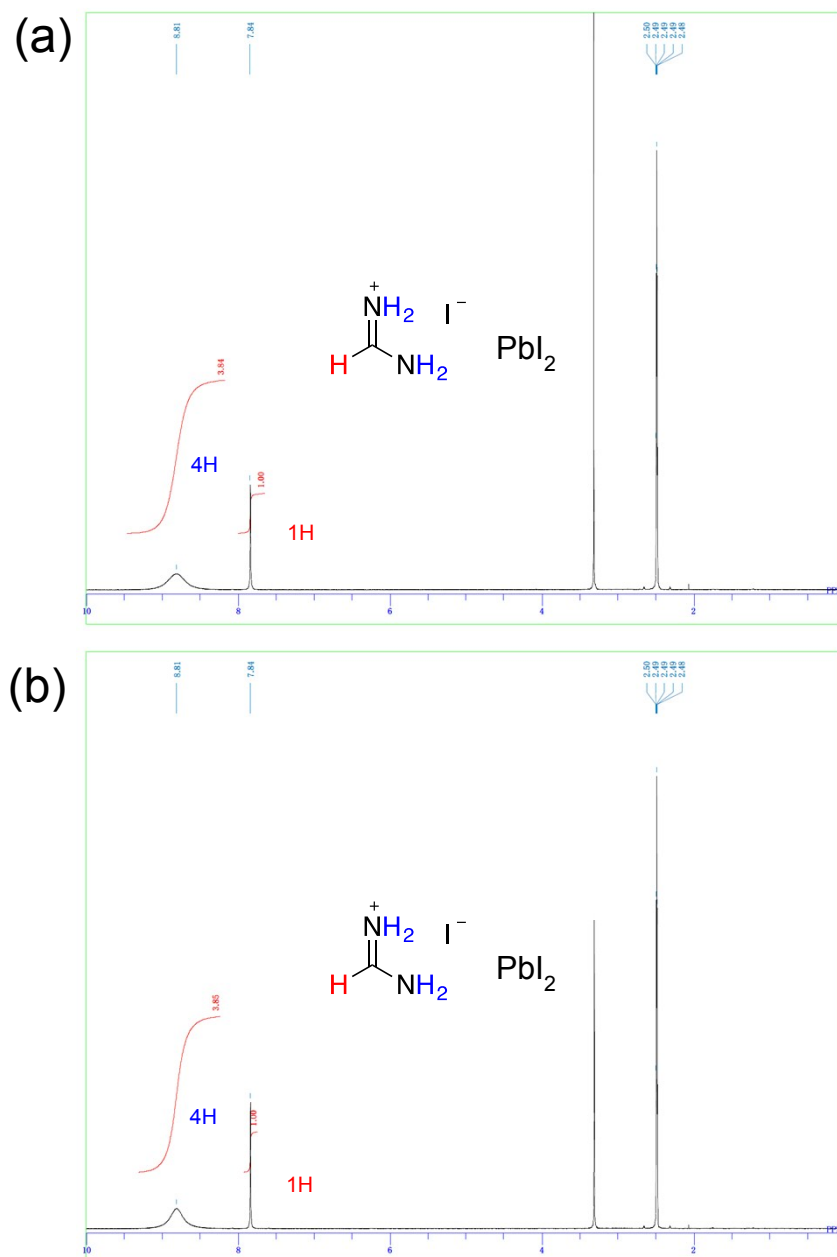

**Figure S4.**  $^1\text{H}$  NMR  $\text{FAPbI}_3$  in  $\text{DMSO}-d_6$  (a) freshly prepared and (b) after 13 months stored under inert atmosphere.

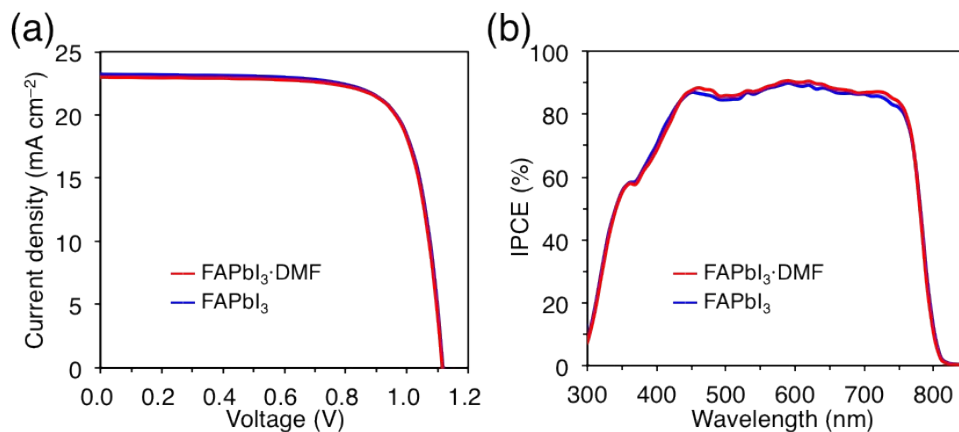

**Figure S5.** (a) The  $J$ – $V$  curves and (b) IPCE spectra of  $\text{Cs}_{0.05}\text{FA}_{0.80}\text{MA}_{0.15}\text{PbI}_{2.75}\text{Br}_{0.25}$ -based (I/Br ratio 11:1) perovskite solar cells fabricated with two different  $\text{FAPbI}_3$  sources:  $\text{FAPbI}_3\cdot\text{DMF}$  (red line) and  $\text{FAPbI}_3$  (blue line). The integrated  $J_{\text{SC}}$  estimated from IPCE was 22.0 and 22.2  $\text{mA cm}^{-2}$  for the  $\text{FAPbI}_3\cdot\text{DMF}$  and  $\text{FAPbI}_3$ , respectively.

**Table S1.** Photovoltaic parameters of the  $\text{Cs}_{0.05}\text{FA}_{0.80}\text{MA}_{0.15}\text{PbI}_{2.75}\text{Br}_{0.25}$ -based (I/Br ratio 11:1) perovskite solar cells with different  $\text{FAPbI}_3$  sources

| $\text{FAPbI}_3$ source         | $J_{\text{SC}}$ ( $\text{mA cm}^{-2}$ ) | $V_{\text{OC}}$ (V) | FF   | PCE (%) | $R_s$ ( $\Omega \text{ cm}^2$ ) | $R_{\text{sh}}$ ( $\Omega \text{ cm}^2$ ) |
|---------------------------------|-----------------------------------------|---------------------|------|---------|---------------------------------|-------------------------------------------|
| $\text{FAPbI}_3\cdot\text{DMF}$ | 23.2                                    | 1.11                | 0.75 | 19.4    | 5.6                             | 5162                                      |
| $\text{FAPbI}_3$                | 23.0                                    | 1.11                | 0.75 | 19.4    | 5.9                             | 8943                                      |

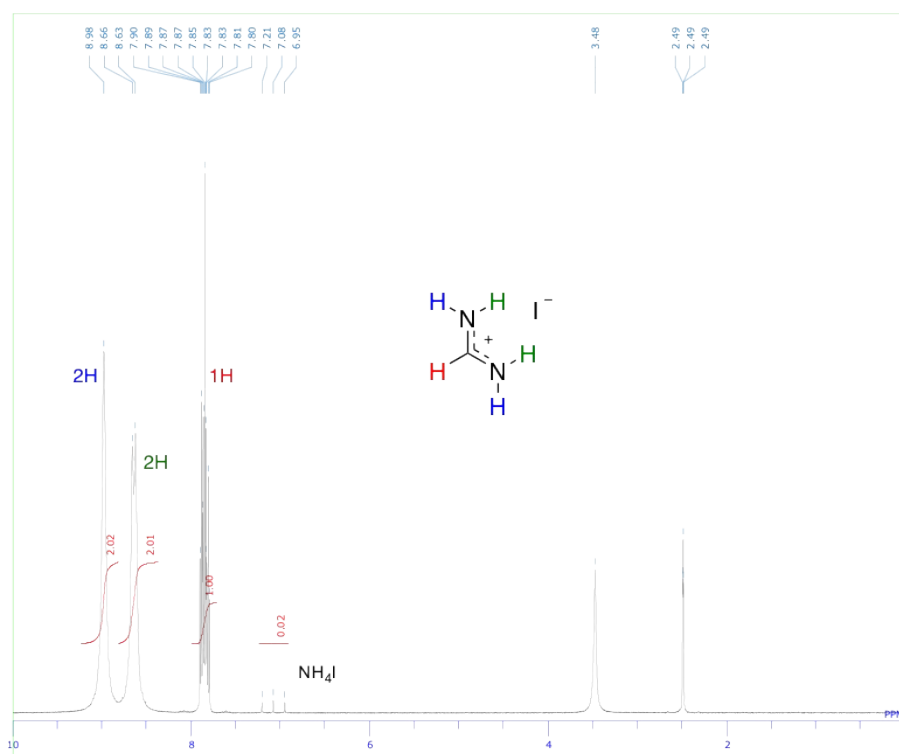

**Figure S6.**  $^1\text{H}$  NMR of FAI (98.0%, stored in inert gas for 17 month) in  $\text{DMSO}-d_6$  with 0.1% TFA.

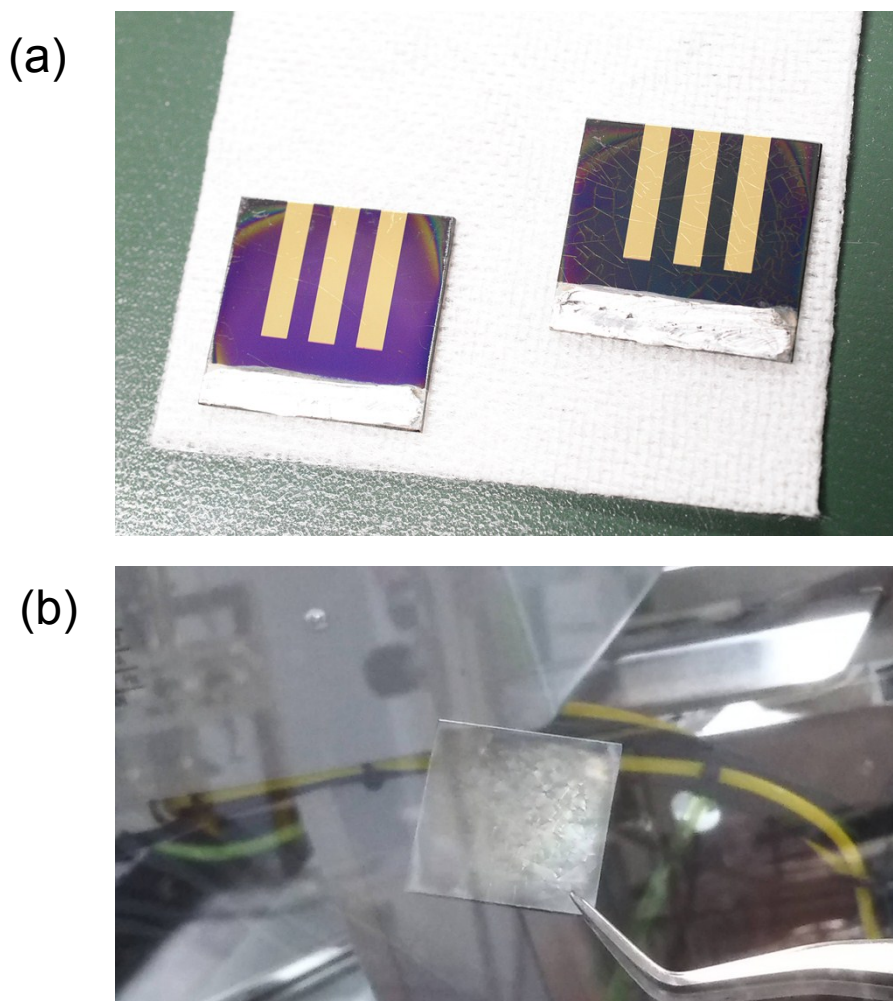

**Figure S7.** (a) Comparison photographs of the solar cell devices fabricated with  $\text{Cs}_{0.05}\text{FA}_{0.80}\text{MA}_{0.15}\text{PbI}_{2.75}\text{Br}_{0.25}$  (I/Br ratio 11:1) (left) and all-iodine  $\text{Cs}_{0.05}\text{FA}_{0.80}\text{MA}_{0.15}\text{PbI}_3$  (I/Br ratio 1:0) mixed composition perovskites (right). (b) Photo of the annealed  $\text{Cs}_{0.05}\text{FA}_{0.80}\text{MA}_{0.15}\text{PbI}_3$  perovskite film before the hole transport and top electrode layers were added.

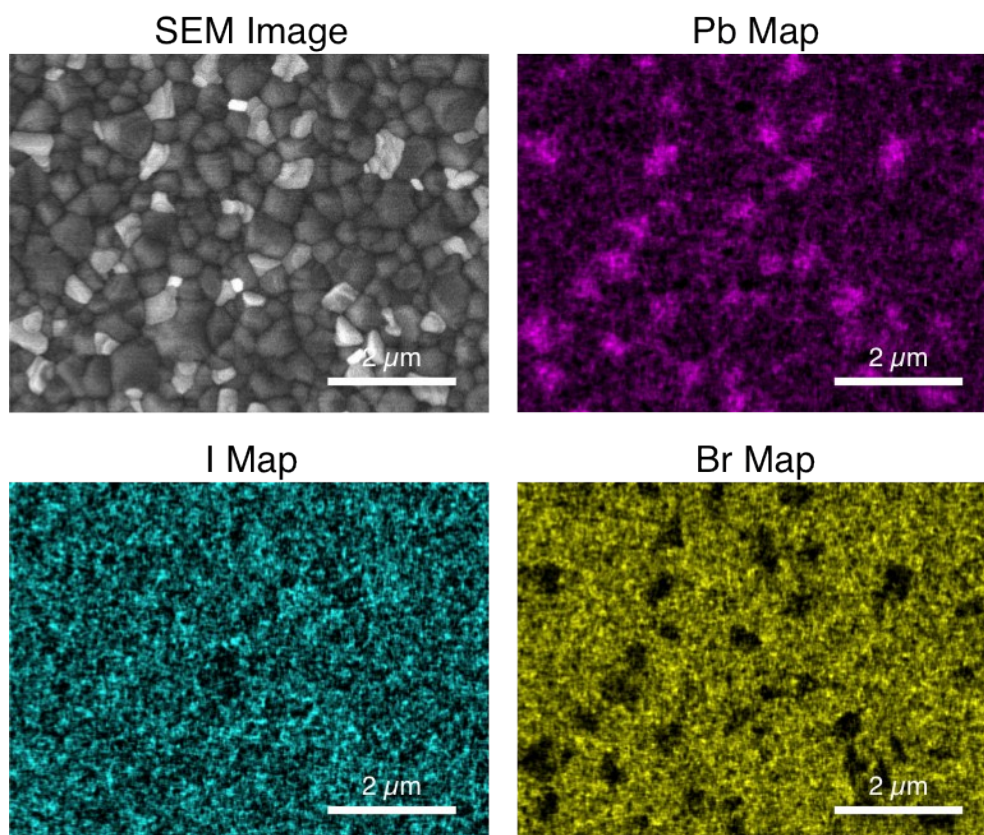

**Figure S8.** The top-view SEM image of the  $\text{Cs}_{0.05}\text{FA}_{0.80}\text{MA}_{0.15}\text{PbI}_{2.75}\text{Br}_{0.25}$  (I/Br ratio 11:1) perovskite film annealed at 150 °C for 30 min, and the corresponding EDX mapping for Pb, I, and Br.

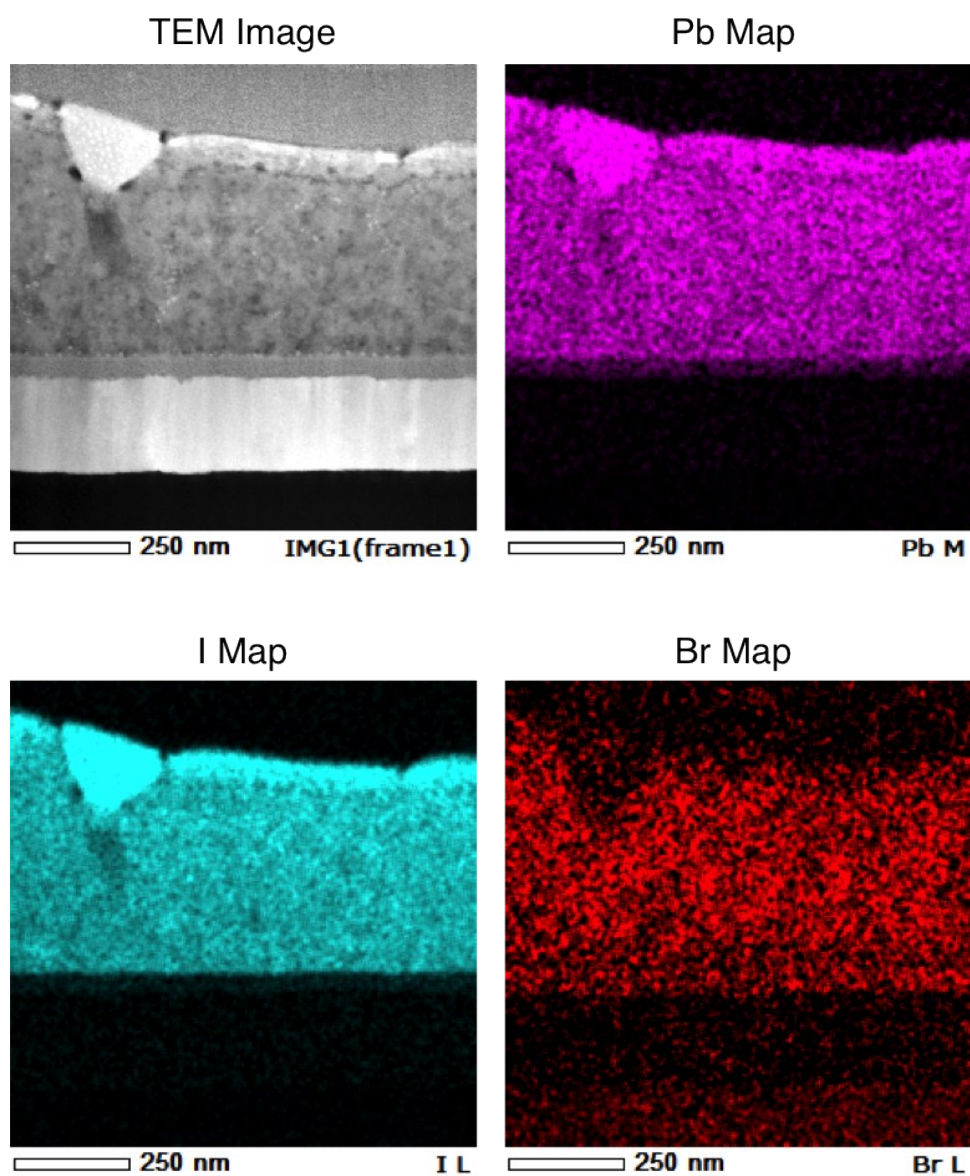

**Figure S9.** The cross-sectional TEM image of the  $\text{Cs}_{0.05}\text{FA}_{0.80}\text{MA}_{0.15}\text{PbI}_{2.75}\text{Br}_{0.25}$  (I/Br ratio 11:1) perovskite film annealed at 150 °C for 10 min, and the corresponding EDX mapping for Pb, I, and Br.

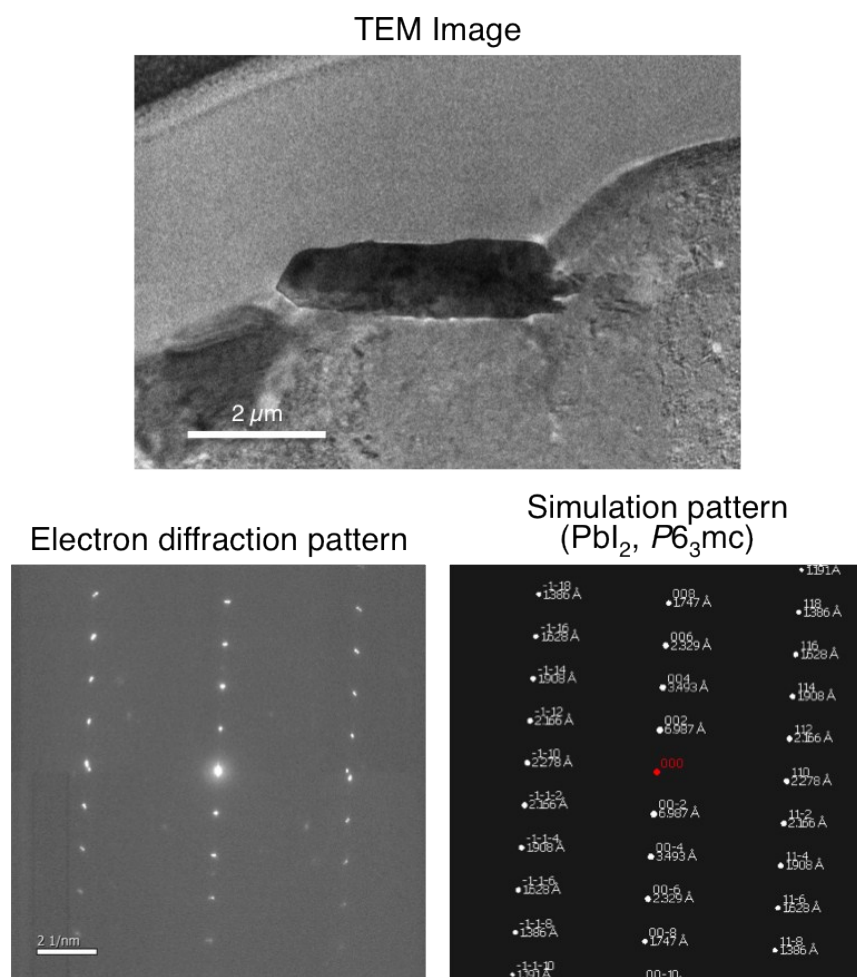

**Figure S10.** A TEM image of the Cs<sub>0.05</sub>FA<sub>0.80</sub>MA<sub>0.15</sub>PbI<sub>2.75</sub>Br<sub>0.25</sub> (I/Br ratio 11:1) perovskite film and the selected-area electron diffraction pattern indicating a PbI<sub>2</sub> (Hexagonal, P6<sub>3</sub>mc).

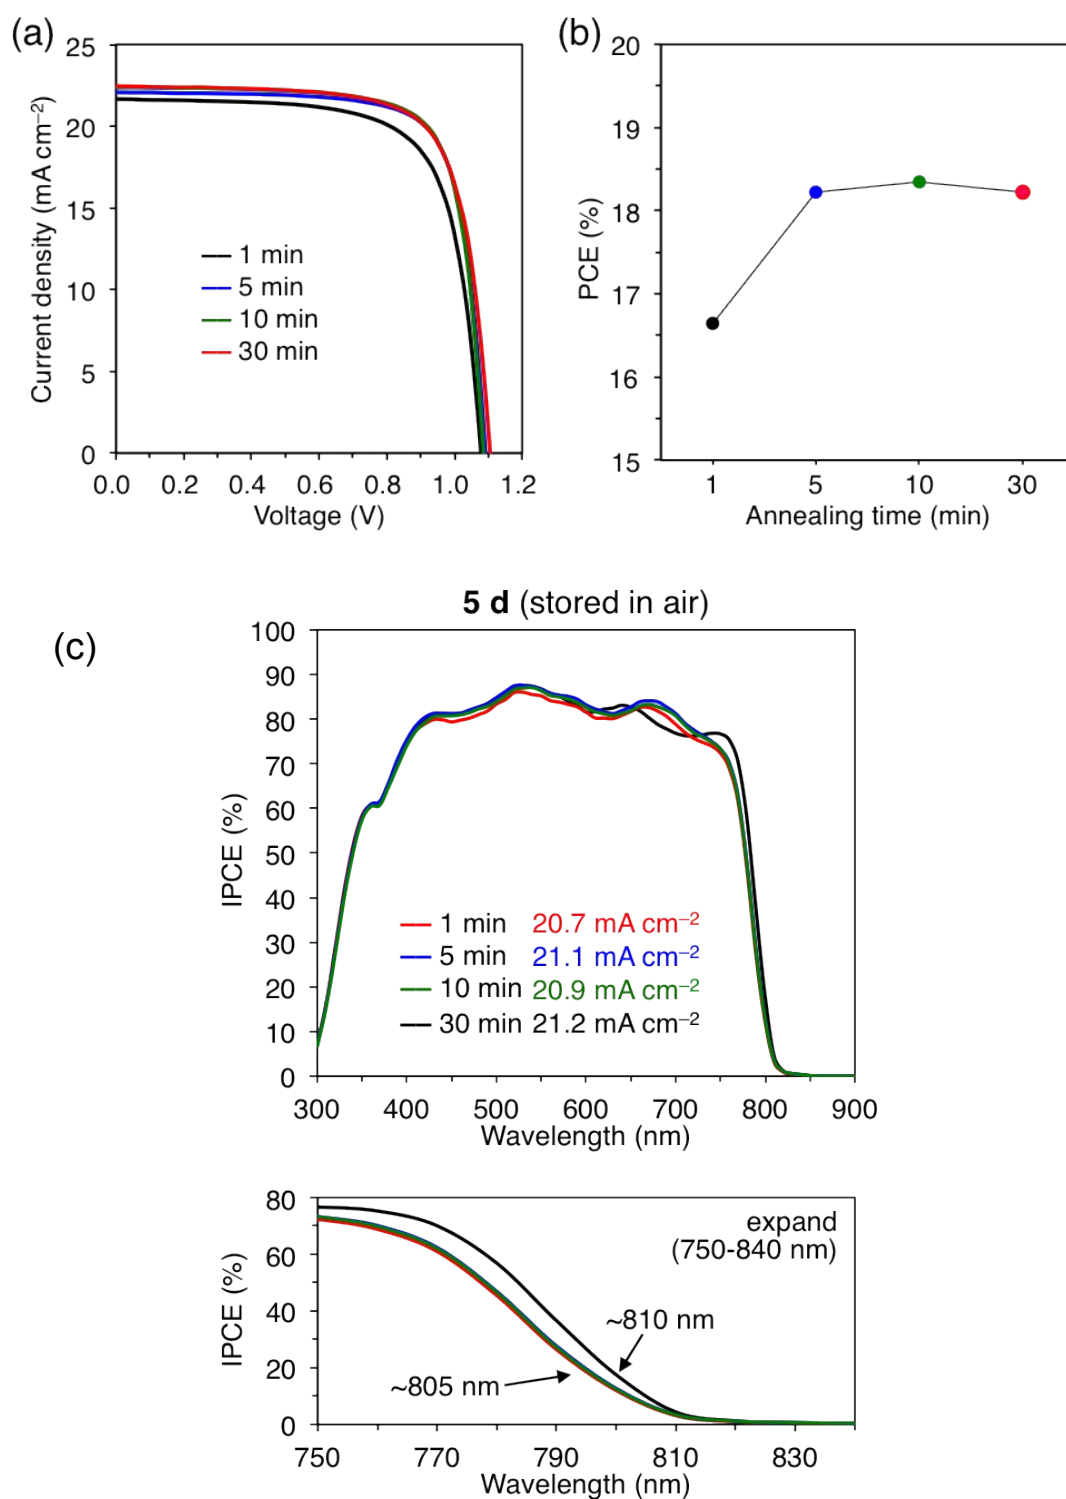

**Figure S11.** (a)  $J-V$  curves (b) PCE plots, and (c) IPCE spectra of the solar cells for different annealing times of the  $\text{Cs}_{0.05}\text{FA}_{0.80}\text{MA}_{0.15}\text{PbI}_{2.75}\text{Br}_{0.25}$  (I/Br ratio 11:1) perovskite layer: 1 min (black), 5 min (blue), 10 min (green), and 30 min (red).

**Table S2.** Photovoltaic parameters of  $\text{Cs}_{0.05}\text{FA}_{0.80}\text{MA}_{0.15}\text{PbI}_{2.75}\text{Br}_{0.25}$  (I/Br ratio 11:1) perovskite solar cells annealed for different times

| Annealing time | $J_{\text{SC}}$ ( $\text{mA cm}^{-2}$ ) | $V_{\text{OC}}$ (V) | FF   | PCE (%) | $R_s$ ( $\Omega \text{ cm}^2$ ) | $R_{\text{sh}}$ ( $\Omega \text{ cm}^2$ ) |
|----------------|-----------------------------------------|---------------------|------|---------|---------------------------------|-------------------------------------------|
| 1 min          | 21.7                                    | 1.07                | 0.72 | 16.6    | 4.8                             | 2198                                      |
| 5 min          | 22.1                                    | 1.09                | 0.76 | 18.2    | 5.4                             | 4785                                      |
| 10 min         | 22.6                                    | 1.07                | 0.76 | 18.4    | 4.5                             | 3183                                      |
| 30 min         | 22.4                                    | 1.10                | 0.74 | 18.2    | 5.2                             | 2711                                      |

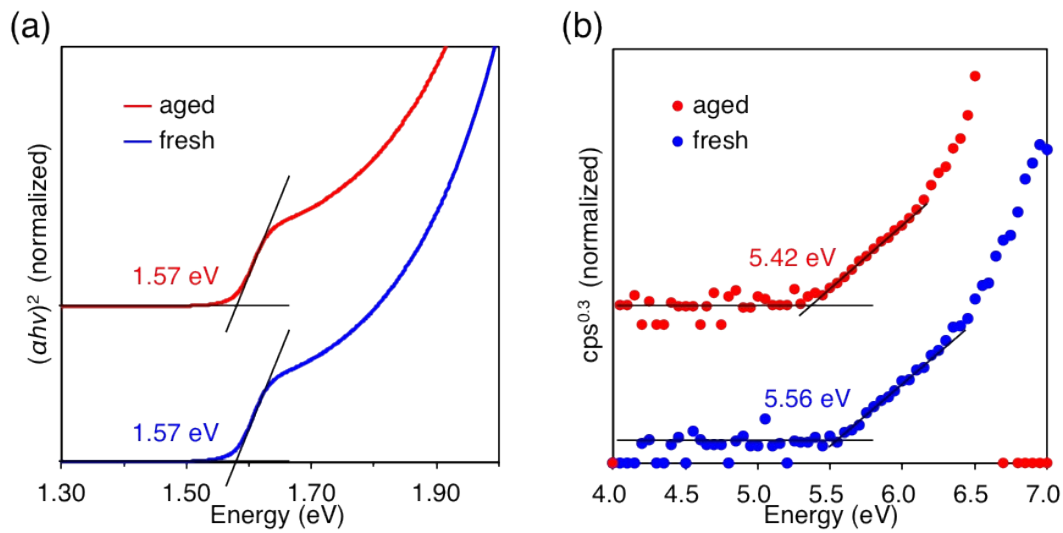

**Figure S12.** (a) Tauc plot and (b) PES spectra of the  $\text{Cs}_{0.05}\text{FA}_{0.80}\text{MA}_{0.15}\text{PbI}_{2.75}\text{Br}_{0.25}$  (I/Br ratio 11:1) perovskite film before (blue) and after aging (red).

**Table S3.** Nuclear data of radioactive nuclides

| Element | Target nuclides   | Isotopic abundance (%) | Cross section <sup>a</sup> (barn) | Produced nuclide <sup>b</sup> | Half life | $\gamma$ -ray energy <sup>c</sup> (keV) |
|---------|-------------------|------------------------|-----------------------------------|-------------------------------|-----------|-----------------------------------------|
| Br      | <sup>81</sup> Br  | 49.31                  | 2.64                              | <sup>82</sup> Br              | 35.34 h   | 776, 554                                |
| I       | <sup>127</sup> I  | 100                    | 6.2                               | <sup>128</sup> I              | 25.0 m    | 443                                     |
| Cs      | <sup>133</sup> Cs | 100                    | 30                                | <sup>134</sup> Cs             | 2.0652 y  | 605, 796                                |

<sup>a</sup>Neutron capture cross-section for thermal neutrons.

<sup>b</sup>Produced by neutron capture reaction.

<sup>c</sup>Used in gamma-ray spectrometry for quantification of elements.

**Table S4.** Neutron activation analysis of Cs<sub>0.05</sub>FA<sub>0.80</sub>MA<sub>0.15</sub>PbI<sub>2.75</sub>Br<sub>0.25</sub> (I/Br ratio 11:1) perovskite films

| Perovskite powder (mg) | Br (mg)       | I (mg)      | Cs (mg)       |
|------------------------|---------------|-------------|---------------|
| 15.3                   | 0.680 ± 0.007 | 6.59 ± 0.19 | 0.133 ± 0.003 |

## References

1. G. M. Sheldrick, SHELX-97, Program for the Refinement of Crystal Structures; University of Göttingen: Göttingen, Germany, **1997**.
